# Supplementary material
Source: PubMed Central journal article supplement (PMC3711030)
Supplement: NIHMS344165-supplement-Supplementary_Table.pdf [file NIHMS344165-supplement-Supplementary_Table.pdf]

**Table S1 LC-MS/MS Analysis of the Immunoprecipitates of anti-Suz12 and Control IgG**

| International Protein Index | kDa   | Unique Peptide Count |     | % Sequence Coverage |     | Protein name | Peptide sequences                                                                                                                                                                                                                                                                                                                 | Protein Description                         |
|-----------------------------|-------|----------------------|-----|---------------------|-----|--------------|-----------------------------------------------------------------------------------------------------------------------------------------------------------------------------------------------------------------------------------------------------------------------------------------------------------------------------------|---------------------------------------------|
|                             |       | anti-Suz12 IP        | IgG | anti-Suz12 IP       | IgG |              |                                                                                                                                                                                                                                                                                                                                   |                                             |
| IPI00124575                 | 137.4 | 5                    | 0   | 5.6                 |     | Jarid2       | KVLYLSLK; SVSLTTFYR; QHGEGLAGSLK; LLYQIAQAEAK; IVEPLLPPPATQISDLSK;                                                                                                                                                                                                                                                                | jumonji, AT rich interactive domain 2       |
| IPI00123127                 | 85.5  | 2                    | 0   | 2.7                 |     | Ezh1         | QVFQFAVK; LPTDELMNPAQK;                                                                                                                                                                                                                                                                                                           | enhancer of zeste homolog 1 (Drosophila)    |
| IPI00396676                 | 83    | 18                   | 0   | 34.1                |     | Suz12        | SYLLFR; QPGFAFSR; ATWETILDGK; ALETDGVSGVPK; NLIAPIFLHR; STAPVAKPLATR; TFVAQMTVFDK; FIFNYVYHPK; IFYQFLYNNNTR; TITQIEEFSDVNEGEK; LPPFETFSQGPTLQFTLR; ASMSEFLESEDGEVEQQR; RLPPFETFSQGPTLQFTLR; TITQIEEFSDVNEGEKEVMK; NSESLHQENKPGSVKPAQTIAVK; NDKPSQNSENEQNSVTLEVLLVK; HGGGGGGSGPSAGSGGGGFGGSAAA VAAAASGGK; MEHVQADHELFLQAFEKPTQIYR; | suppressor of zeste 12 homolog (Drosophila) |

|             |      |    |   |      |  |       |                                                                                                                                                                                                                    |                                                          |
|-------------|------|----|---|------|--|-------|--------------------------------------------------------------------------------------------------------------------------------------------------------------------------------------------------------------------|----------------------------------------------------------|
| IPI00312722 | 80.5 | 9  | 0 | 17.6 |  | Ezh2  | EFAAALTAER; TETLNQEWK;<br>IFEAISSMFPDK; IQPVHIMTSVSSLR;<br>AIQTGEELFFDYR; ESSIIAPVPTEDVDTPPR;<br>LPNNSRPSTPTISVLESK;<br>IFEAISSMFPDKGTAEELK;<br>MKPNIIPPENVEWSGAEASMFR;                                            | enhancer of zeste homolog 2 (Drosophila)                 |
| IPI00133903 | 73.5 | 1  | 0 | 4.6  |  | Hspa9 | AQFEGIVTDLIK;                                                                                                                                                                                                      | heat shock protein 9                                     |
| IPI00467892 | 66.9 | 11 | 0 | 21.2 |  | Mtf2  | TAELPLDK; SWPAAIPHLR; FEEGQDVLAR;<br>VPPVPPNVAFK; LHPGELADTPK;<br>SVGRPPGPYTR; ALQTQNSEVVK;<br>NSITSYFGAAGR; VQYLVEWEGATAS;<br>YEHVLEALNDYK;<br>QTLPYSVADLEWDAGHK;                                                 | metal response element binding transcription<br>factor 2 |
| IPI00312600 | 50.2 | 14 | 0 | 34.9 |  | Eed   | MLALGNQVGK; WLGDILISK;<br>DPNLLSVSK; FSMDFWQK; IHFPDFSTR;<br>ESYDYNPNK; IINPITMQCIK;<br>IKPSESNTILGR; EVSTAPAGTDMPPAAK;<br>HYVGHGNAINELK; EGDPLVFATVGSNR;<br>VTLYECHSQGEIR; LYVWDLEVEDPHK;<br>MEDDIDKIKPSESNTILGR; | embryonic ectoderm development                           |

|             |      |   |   |      |  |               |                                                                                                                                      |                                  |
|-------------|------|---|---|------|--|---------------|--------------------------------------------------------------------------------------------------------------------------------------|----------------------------------|
| IPI00122698 | 47.8 | 6 | 0 | 17.6 |  | Rbbp7         | LMIWDTR; TVALWDLR; LNVWDLK;<br>YMPQNPHIATK; TPSSDVLVFDYTK;<br>IGEEQSAEDAEDGPPPELLFIHGGHTAK;                                          | retinoblastoma binding protein 7 |
| IPI00122696 | 47.6 | 8 | 0 | 24.7 |  | Rbbp4         | LMIWDTR; TVALWDLR; LNVWDLK;<br>GEFGGFGSVSGK; TPSSDVLVFDYTK;<br>ADKEAAFDDAVEER;<br>HPSKPDPSGECNPDLR;<br>IGEEQSPEDAEDGPPPELLFIHGGHTAK; | retinoblastoma binding protein 4 |
| IPI00223156 | 38.1 | 2 | 0 | 6.2  |  | E130012A19Rik | GFALDTPSLR; RRPAPPPSVQPR                                                                                                             | RIKEN cDNA E130012A19 gene       |

| <b>Table S2</b> |           | <b>Sequences For PCR Primers and shRNAs</b> |                                                 |
|-----------------|-----------|---------------------------------------------|-------------------------------------------------|
| <b>RT-PCR</b>   | SUZ12     | Forward                                     | <a href="#"><u>CGCGAAGATGGAGAAAAGAC</u></a>     |
|                 |           | Reverse                                     | <a href="#"><u>CCGGTCCATTTCGACTAAAA</u></a>     |
|                 | MTF2      | Forward                                     | <a href="#"><u>GGTGCTTCCAGTGCAAACGAAACT</u></a> |
|                 |           | Reverse                                     | <a href="#"><u>TCGCTCCTTCCCATTCCACAAGAT</u></a> |
|                 | esPRC2p48 | Forward                                     | <a href="#"><u>CCGGCTGATGCTCTTTCTAC</u></a>     |
|                 |           | Reverse                                     | <a href="#"><u>CGGAGAGAAAAGAGGGAGGT</u></a>     |
|                 | JARID2    | Forward                                     | <a href="#"><u>GATTGCACAAGCAGAAGCAA</u></a>     |
|                 |           | Reverse                                     | <a href="#"><u>TTGGTGTGGGTTTGTGAGA</u></a>      |
|                 | EZH1      | Forward                                     | <a href="#"><u>AGTGGATGCTACCCGAAAGGAAA</u></a>  |
|                 |           | Reverse                                     | <a href="#"><u>ATGGTAGCACTGGTTGGTTCCTGA</u></a> |
|                 | EZH2      | Forward                                     | <a href="#"><u>TACATCCCTTCCATGCAACA</u></a>     |
|                 |           | Reverse                                     | <a href="#"><u>CCGAGAATTGCTTCAGAGG</u></a>      |
|                 | Pax3      | Forward                                     | <a href="#"><u>TGCCCTCAGTGAGTTCTATCAGC</u></a>  |
|                 |           | Reverse                                     | <a href="#"><u>GCTAAACCAGACCTGCACTCGGGC</u></a> |
|                 | Pax7      | Forward                                     | <a href="#"><u>GCTACCAGTACAGCCAGTATG</u></a>    |
|                 |           | Reverse                                     | <a href="#"><u>GTCACTAAGCATGGGTAGATG</u></a>    |
|                 | Brachyury | Forward                                     | <a href="#"><u>TGCTGCCTGTGAGTCATAC</u></a>      |
|                 |           | Reverse                                     | <a href="#"><u>ACAAGAGGCTGTAGAACATG</u></a>     |
|                 | GAPDH     | Forward                                     | <a href="#"><u>TCTGGAAAGCTGTGGCGTG</u></a>      |
|                 |           | Reverse                                     | <a href="#"><u>TCCTTGGAGGCCATGTAGGC</u></a>     |
|                 | Tgfβ2     | Forward                                     | <a href="#"><u>TCGCTCATCTCCACAGTGAC</u></a>     |
|                 |           | Reverse                                     | <a href="#"><u>CGACTCCACGTTTTCCAGAT</u></a>     |
|                 | Tgfβ1     | Forward                                     | <a href="#"><u>GACTCTCCACCTGCAAGACC</u></a>     |
|                 |           | Reverse                                     | <a href="#"><u>CGTCAAAAGACAGCCACTCA</u></a>     |
|                 | Zeb2      | Forward                                     | <a href="#"><u>CGGCTTCTTCATGCTTTTTTC</u></a>    |
|                 |           | Reverse                                     | <a href="#"><u>CAGCTGTGCTCCACAACACT</u></a>     |
|                 | Snail1    | Forward                                     | <a href="#"><u>GAGGACAGTGGCAAAAGCTC</u></a>     |
|                 |           | Reverse                                     | <a href="#"><u>GGAGAATGGCTTCTCACCAG</u></a>     |
|                 | Gata1     | Forward                                     | <a href="#"><u>GATGGAATCCAGACGAGGAA</u></a>     |
|                 |           | Reverse                                     | <a href="#"><u>CAGCAGAGGTCCAGGAAAAG</u></a>     |
|                 | Gata3     | Forward                                     | <a href="#"><u>CTGGAGGAGGAACGCTAATGG</u></a>    |
|                 |           | Reverse                                     | <a href="#"><u>CATCTTCCGGTTTCGGGTCT</u></a>     |
|                 | Gata4     | Forward                                     | <a href="#"><u>GTCGTAATGCCGAGGGTGA</u></a>      |
|                 |           | Reverse                                     | <a href="#"><u>TCCTTCCGCATTGCAAGAG</u></a>      |
|                 | Lenti     | Forward                                     | <a href="#"><u>gatgaactgaccaggcacta</u></a>     |

|              |           |         |                                                                   |
|--------------|-----------|---------|-------------------------------------------------------------------|
|              |           | Reverse | <a href="#">gattatcgggaattccctcgag</a>                            |
| Nanog        |           | Forward | <a href="#">accaaaggatgaagtgcgaag</a>                             |
|              |           | Reverse | <a href="#">agtttgctgcaactgtacg</a>                               |
| Oct4         |           | Forward | <a href="#">agcttgggctagagaaggat</a>                              |
|              |           | Reverse | <a href="#">tcagttgaaatgcatgggag</a>                              |
| Sox2         |           | Forward | <a href="#">tgcacatggcccagcacta</a>                               |
|              |           | Reverse | <a href="#">tttccagttcgagtcag</a>                                 |
| Cripto       |           | Forward | <a href="#">aactgctgtctgaatggag</a>                               |
|              |           | Reverse | <a href="#">tttgaggtcctggtccatca</a>                              |
| KLF4         |           | Forward | <a href="#">cagcaggactgtcacctg</a>                                |
|              |           | Reverse | <a href="#">gtcacatccactacgtgggat</a>                             |
| Nat1         |           | Forward | <a href="#">ggagagtgcgattgcagaag</a>                              |
|              |           | Reverse | <a href="#">gtcacatccactacgtggga</a>                              |
| HOXA9        |           | Forward | <a href="#">tgtggactccttctctgctg</a>                              |
|              |           | Reverse | <a href="#">gcatcgcttcttccgagt</a>                                |
| HOXB1        |           | Forward | <a href="#">ccagctatggccttctcag</a>                               |
|              |           | Reverse | <a href="#">ggcacggctcaggtattgt</a>                               |
| HOXC5        |           | Forward | <a href="#">tgtgggaactatggatcggc</a>                              |
|              |           | Reverse | <a href="#">taactggttcgggaccgct</a>                               |
| HOXD10       |           | Forward | <a href="#">gattccttgatcagtgctgc</a>                              |
|              |           | Reverse | <a href="#">catgacagtggagctgccttc</a>                             |
| <b>shRNA</b> | SUZ12     |         | GCTGTTACCAAGCTCCGAG<br>GAGCAACATGGGAGACAAT                        |
|              | JARID2    |         | GGTGGACACTAATACCCAT<br>GATGATGAGACGGAAGATG                        |
|              | MTF2      |         | GCTCCCAATGAAATGGTTA<br>GGAATCAGTTTCAGAGAAT<br>GGAAGTAAGCAATGGGATA |
|              | esPRC2p48 |         | GCTCGAAACTTTGGTGTTA<br>GGAAGAGAACGGAGACCTA<br>GGACCTTGGTGATGGACAA |
|              | CFP       |         | GCAAGCTGACCCTGAAGTT                                               |

|             |                |         |                                             |                                             |
|-------------|----------------|---------|---------------------------------------------|---------------------------------------------|
| <b>CHIP</b> | Tgfb $\beta$ 2 | 1       | Forward                                     | <a href="#"><u>GTTTGCTGGTCACCCAGTCT</u></a> |
|             |                |         | Reverse                                     | <a href="#"><u>TTCTTGTCTCGTGCATCTGG</u></a> |
|             |                | 2       | Forward                                     | <a href="#"><u>GAAGCAGTGTTTGGTGCTGA</u></a> |
|             |                |         | Reverse                                     | <a href="#"><u>CATGCCTGTTGCAGAAGCTA</u></a> |
|             | HoxC5          | 1       | Forward                                     | <a href="#"><u>CTCTGTCTCCGGGTTCTCCT</u></a> |
|             |                |         | Reverse                                     | <a href="#"><u>AGGCCAGAACTCAGTTTCCA</u></a> |
| 2           |                | Forward | <a href="#"><u>TACAGCCCAGCCTATCTGGT</u></a> |                                             |
|             |                | Reverse | <a href="#"><u>GCTCTTAGCCCAGGTTTCAA</u></a> |                                             |
| 3           |                | Forward | <a href="#"><u>CCAAGCAAGAGACCTTGACC</u></a> |                                             |
|             |                | Reverse | <a href="#"><u>ATGCGCTCTTCCCAAATAAG</u></a> |                                             |

**Table S3 Amino Acids Sequences for the Peptides used In the Peptide Array**

| SPOT | Residue<br># from<br>N-term | Mods                 | Grid Location | Sequence               | Peptide # |
|------|-----------------------------|----------------------|---------------|------------------------|-----------|
| H3   | 1 - 12                      | none                 | A 1           | HHHHHHHHHHHH           | 1         |
| H3   | 1 - 13                      | none                 | A 2           | ARTKQTARKSTGG          | 2         |
| H3   | 1 - 13                      | R2 - monoMe          | A 3           | ARmeTKQTARKSTGG        | 3         |
| H3   |                             | R2 - sym diMe        | A 4           | ARme2(s)TKQTARKSTGG    | 4         |
| H3   |                             | R2 - asym diMe       | A 5           | ARme2(a)TKQTARKSTGG    | 5         |
| H3   |                             | K4 - monoMe          | A 6           | ARTKmeQTARKSTGG        | 6         |
| H3   |                             | K4 - diMe            | A 7           | ARTKme2QTARKSTGG       | 7         |
| H3   |                             | K4 - triMe           | A 8           | ARTKme3QTARKSTGG       | 8         |
| H3   |                             | K9 - monoMe          | A 9           | ARTKQTARKmeSTGG        | 9         |
| H3   |                             | K9 - diMe            | A 10          | ARTKQTARKme2STGG       | 10        |
| H3   |                             | K9 - triMe           | B 1           | ARTKQTARKme3STGG       | 11        |
| H3   |                             | K9 - ac              | B 2           | ARTKQTARKacSTGG        | 12        |
| H3   |                             | S10 - phosph         | B 3           | ARTKQTARKpSTGG         | 13        |
| H3   |                             | R2 - monoMe/K4me3    | B 4           | ARmeTKme3QTARKSTGG     | 14        |
| H3   |                             | R2 - sym diMe/K4me3  | B 5           | ARme2(s)TKme3QTARKSTGG | 15        |
| H3   |                             | R2 - asym diMe/K4me3 | B 6           | ARme2(a)TKme3QTARKSTGG | 16        |
| H3   | 5 - 20                      | none                 | B 7           | QTARKSTGGKAPRKQL       | 17        |
| H3   |                             | S10 - phosph/K14ac   | B 8           | QTARKpSTGGKacAPRKQL    | 18        |

|           |         |                    |   |    |                                             |    |
|-----------|---------|--------------------|---|----|---------------------------------------------|----|
| <b>H3</b> |         | K14 - ac           | B | 9  | Q T A R K S T G G K a c A P R K Q L         | 19 |
| <b>H3</b> |         | R17 - monoMe       | B | 10 | Q T A R K S T G G K A P R m e K Q L         | 20 |
| <b>H3</b> |         | R17 - sym diMe     | C | 1  | Q T A R K S T G G K A P R m e 2 ( s ) K Q L | 21 |
| <b>H3</b> |         | R17 - asym diMe    | C | 2  | Q T A R K S T G G K A P R m e 2 ( a ) K Q L | 22 |
| <b>H3</b> |         | K18 - ac           | C | 3  | Q T A R K S T G G K A P R K a c Q L         | 23 |
| <b>H3</b> |         | K14ac/K18ac        | C | 4  | Q T A R K S T G G K a c A P R K a c Q L     | 24 |
| <b>H3</b> |         | K9 - monoMe/K14ac  | C | 5  | Q T A R K m e S T G G K a c A P R K Q L     | 25 |
| <b>H3</b> |         | K9 - diMe/K14ac    | C | 6  | Q T A R K m e 2 S T G G K a c A P R K Q L   | 26 |
| <b>H3</b> |         | K9 - triMe/K14ac   | C | 7  | Q T A R K m e 3 S T G G K a c A P R K Q L   | 27 |
| <b>H3</b> |         | K9 - ac/K14ac      | C | 8  | Q T A R K a c S T G G K a c A P R K Q L     | 28 |
| <b>H3</b> | 15 - 29 | none               | C | 9  | A P R K Q L A T K A A R K S A               | 29 |
| <b>H3</b> |         | K23 - monoMe       | C | 10 | A P R K Q L A T K m e A A R K S A           | 30 |
| <b>H3</b> |         | K23 - diMe         | D | 1  | A P R K Q L A T K m e 2 A A R K S A         | 31 |
| <b>H3</b> |         | K23 - triMe        | D | 2  | A P R K Q L A T K m e 3 A A R K S A         | 32 |
| <b>H3</b> |         | K18 - ac           | D | 3  | A P R K a c Q L A T K A A R K S A           | 33 |
| <b>H3</b> |         | K18ac/K27 monoMe   | D | 4  | A P R K a c Q L A T K A A R K m e S A       | 34 |
| <b>H3</b> |         | K18ac/K27 - diMe   | D | 5  | A P R K a c Q L A T K A A R K m e 2 S A     | 35 |
| <b>H3</b> |         | K18ac/K27 - triMe  | D | 6  | A P R K a c Q L A T K A A R K m e 3 S A     | 36 |
| <b>H3</b> |         | K23 - ac           | D | 7  | A P R K Q L A T K a c A A R K S A           | 37 |
| <b>H3</b> |         | K23ac/K27 - monoMe | D | 8  | A P R K Q L A T K a c A A R K m e S A       | 38 |
| <b>H3</b> |         | K23ac/K27 - diMe   | D | 9  | A P R K Q L A T K a c A A R K m e 2 S A     | 39 |
| <b>H3</b> |         | K23ac/K27 - triMe  | D | 10 | A P R K Q L A T K a c A A R K m e 3 S A     | 40 |
| <b>H3</b> |         | K18 - ac/K23 -ac   | E | 1  | A P R K a c Q L A T K a c A A R K S A       | 41 |

|           |         |                 |      |                                   |    |
|-----------|---------|-----------------|------|-----------------------------------|----|
| <b>H3</b> | 21 - 34 | none            | E 2  | A T K A A R K S A P A T G G       | 42 |
| <b>H3</b> |         | R26 - monoMe    | E 3  | A T K A A Rme K S A P A T G G     | 43 |
| <b>H3</b> |         | R26 - sym diMe  | E 4  | A T K A A Rme2(s) K S A P A T G G | 44 |
| <b>H3</b> |         | R26 - asym diMe | E 5  | A T K A A Rme2(a) K S A P A T G G | 45 |
| <b>H3</b> |         | K27 - monoMe    | E 6  | A T K A A R Kme S A P A T G G     | 46 |
| <b>H3</b> |         | K27 - diMe      | E 7  | A T K A A R Kme2 S A P A T G G    | 47 |
| <b>H3</b> |         | K27 - triMe     | E 8  | A T K A A R Kme3 S A P A T G G    | 48 |
| <b>H3</b> |         | S28 - phosph    | E 9  | A T K A A R K pS A P A T G G      | 49 |
| <b>H3</b> | 30 - 42 | none            | E 10 | P A T G G V K K P H R Y R         | 50 |
